# Supplementary material for: Characterizing the free ammonia exposure to the nutrients removal in activated sludge systems
Source: Royal Society of Chemistry journal article supplement (doi:10.1039/c7ra10751j), 2017-01-01
Supplement: c7ra10751j1.pdf [file c7ra10751j1.pdf]

1 **Characterizing the free ammonia exposure to the nutrients removal in activated**  
2 **sludge systems**

3  
4 Jiashun Cao <sup>1,2</sup>, Yunxiao Yu <sup>1,2</sup>, Kun Xie<sup>1,3</sup>, Jingyang Luo <sup>1,2\*</sup>, Qian Feng <sup>1,2</sup>, Fang Fang  
5 <sup>1,2</sup>, Chao Li <sup>1,2</sup>, Zhaoxia Xue <sup>1,2</sup>

6  
7 <sup>1</sup> *Key Laboratory of Integrated Regulation and Resource Development on Shallow Lakes,*

8 *Ministry of Education, Hohai University, Nanjing 210098, China*

9 <sup>2</sup> *College of Environment, Hohai University, Nanjing 210098, China*

10 <sup>3</sup> *Jiangsu Institute of Urban Planning and Design, Nanjing 210098, China*

11

12

13 \*Corresponding author: Jingyang Luo

14 E-mail: luojoy2016@hhu.edu.cn

15 Tel: 86-25-83786701

16 Fax: 86-25-83786701

17

18

Table S1 Variations of  $\text{NH}_4^+\text{-N}$  concentration in the liquor wastewater

| Time                            | September | October | November | December-May |
|---------------------------------|-----------|---------|----------|--------------|
| $\text{NH}_4^+\text{-N}$ (mg/L) | 250~400   | 180~250 | 90~110   | 80           |

19

Table S2 Fluorescence spectral parameters of sludge in cycle1 and 27

| FA       | Cycle 1 |        |           |            | Cycle 27 |        |           |            |
|----------|---------|--------|-----------|------------|----------|--------|-----------|------------|
|          | Peak    | Ex/Em  | Intensity | Component  | Peak     | Ex/Em  | Intensity | Component  |
| 2.8mg/L  | A       | 270/37 | 1660      | Tryptophan | A        | 265/37 | 2680      | Tryptophan |
|          | /       | /      | /         | /          | B        | 230/30 | 2606      | Tyrosine   |
|          |         |        |           |            | C        | 205/30 | 1805      | Aromatic   |
| 5.6mg/L  | A       | 270/37 | 1867      | Tryptophan | A        | 265/37 | 2462      | Tryptophan |
|          | B       | 230/30 | 1818      | Tyrosine   | B        | 230/30 | 3196      | Tyrosine   |
|          | /       | /      | /         | /          | C        | 205/30 | 4364      | Aromatic   |
| 11.1mg/L | A       | 265/37 | 1703      | Tryptophan | A        | 265/37 | 3619      | Tryptophan |
|          | B       | 230/30 | 1552      | Tyrosine   | B        | 225/30 | 4512      | Tyrosine   |
|          | /       | /      | /         | /          | C        | 215/30 | 4536      | Aromatic   |
| 19.5mg/L | A       | 265/37 | 2053      | Tryptophan | A        | 270/37 | 3243      | Tryptophan |
|          | B       | 225/30 | 1954      | Tyrosine   | B        | 225/30 | 3892      | Tyrosine   |
|          | /       | /      | /         | /          | C        | 205/30 | 5778      | Aromatic   |

22  
23

Table S3 Overviews of high-throughput sequencing results and microbial community diversities

| Sample | Sequence number | OTUs | Coverage | Simpson | Chao1 |
|--------|-----------------|------|----------|---------|-------|
| R0     | 44292           | 3639 | 0.95     | 0.015   | 10508 |
| R1     | 42143           | 2343 | 0.96     | 0.025   | 10610 |
| R3     | 37006           | 2016 | 0.96     | 0.081   | 8896  |

24
